# Supplementary material
Source: PubMed Central journal article supplement (PMC5244408)
Supplement: NIHMS797594-supplement-Supplemental_Table_1.pdf [file NIHMS797594-supplement-Supplemental_Table_1.pdf]

| Patient | Age | Gender | Status | Karyotype | FLT3 Mutations    | Other Mutations                           |
|---------|-----|--------|--------|-----------|-------------------|-------------------------------------------|
| 1       | 53  | M      | Dx     | Diploid   | ITD, 28%, >170 bp | KMT2D, NPM1                               |
| 2       | 71  | F      | Dx     | Diploid   | ITD 39%, 15 bp    | NOTCH2, IDH1, DNMT3A, NPM1, RECQL4, KDM6A |
| 3       | 58  | F      | Dx     | Diploid   | ITD 83% 12 bp     | DNMT3A, NPM1, BCORL3, EP300               |
| 4       | 27  | F      | Rel    | t(5;18)   | ITD 273% 90 bp    | NOTCH2, WT1, KMT2D, IDH1                  |
| 5       | 49  | F      | Rel    | Diploid   | ITD 646% 24 bp    | WT1, NPM1                                 |
| 6       | 61  | M      | Rel    | Diploid   | ITD 30 bp         | WT1, NPM1                                 |
| 7       | 55  | M      | Rel    | Diploid   | ITD 641% 39 bp    | WT1, PTPN11, DNMT3A, ASXL1, NPM1          |
| 8       | 56  | F      | Rel    | Diploid   | ITD 268% 63 bp    | IDH1, CBLB, NPM1, ATRX                    |
| 9       | 62  | F      | Rel    | Diploid   | ITD 21% 42 bp     | PTEN, WT1, KMT2C, RECQL4                  |

**Supplemental Table 1.** Clinical and molecular characteristics of the AML patient samples. Dx = Specimen collected at diagnosis. Rel. = Specimen collected at relapse.
